# Supplementary material
Source: PubMed Central journal article supplement (PMC3005876)
Supplement: supp_18.1.82_Appendix1.pdf [file supp_18.1.82_Appendix1.pdf]

## Appendix

### Suggestions for Further Reading

Anderson J, Goodman KW. *Ethics and Information Technology: A Case-Based Approach to a Health Care System in Transition*. New York: Springer, 2002.

Ash JS, Berg M, Coiera E. Some unintended consequences of information technology in health care: the nature of patient care information system-related errors. *J Am Med Inform Assoc*. 2004 11(2):104-12.

Ash JS, Sittig DF, Dykstra R, Campbell E, Guappone K. The unintended consequences of computerized provider order entry: findings from a mixed methods exploration. *Int J Med Inform* 2009;78 Suppl 1:S69-76.

Ash JS, Sittig DF, Poon EG, Guappone K, Campbell E, Dykstra RH. The extent and importance of unintended consequences related to computerized provider order entry. *J Am Med Inform Assoc*. 2007;14(4):415-23.

Berner ES. Ethical and legal issues in the use of health information technology to improve patient safety. *HEC Forum* 2008;20(3):243-58.

Berner ES. Ethical and legal issues in the use of clinical decision support systems. *Journal of Healthcare Information Management* 2002;16(4):34-7.

Blumenthal D. Launching HITECH. *N Engl J Med* 2010;362(5):382-5.

Buntin MB, Jain SH, Blumenthal D. Health information technology: laying the infrastructure for national health reform. *Health Aff (Millwood)* 2010;29(6):1214-9.

Campbell EM, Guappone KP, Sittig DF, Dykstra RH, Ash JS. Computerized provider order entry adoption: implications for clinical workflow. *J Gen Intern Med* 2009;24(1):21-6.

Caudill-Slosberg, M, Weeks, W.B. Case Study: identifying potential problems at the human/technical interface in complex clinical systems. *Am J Med Qual* 2005;20(6):353-357.

Cornford T, Klecun-Dabrowska E. *Ethical perspectives in evaluation of Telehealth*. Cambridge Quarterly of Healthcare Ethics 2001;10(2):161-9.

Friedman CP. A "fundamental theorem" of biomedical informatics. *J Am Med Inform Assoc*. 2009;16(2):169-70.

Friedman CP, Iakovidis I, Debenedetti L, Lorenzi NM. Across the Atlantic cooperation to address international challenges in eHealth and health IT: managing toward a common goal. *Int J Med Inform* 2009;78(11):778-84.

Goedert J. Is 'speak no evil' a contract clause? Health Data Management Magazine. 2010;April 1. Available from [http://www.healthdatamanagement.com/issues/18\\_4/regulation-ehr-contract-hospital-congress-fda-40004-1.html](http://www.healthdatamanagement.com/issues/18_4/regulation-ehr-contract-hospital-congress-fda-40004-1.html)

Goodman KW., ed., Ethics, Computing and Medicine: Informatics and the Transformation of Health Care. New York: Cambridge University Press, 1998.

Goodman KW. Ethics, information technology and public health: New challenges for the clinician-patient relationship. Journal of Law, Medicine and Ethics 2010;38(1):58-63.

Goodman KW, Miller RA. Ethics and health informatics: Users, standards, and outcomes. In Shortliffe EH, et al., eds. Biomedical Informatics: Computer Applications in Health Care and Biomedicine. Third Edition. New York: Springer, 2006, pp. 379-402.

Harrison M, Koppel R. Interactive sociotechnical analysis: Identifying and coping with unintended consequences of IT implementation. In Khoumbati K, Dwivedi YK, Srivastava A, Lal B., eds., Handbook of Research on Advances in Health Informatics and Electronic Healthcare Applications: Global Adoption and Impact of Information Communication Technologies. Hershey, PA: IGI Global, 2010, pp. 33-51.

Harrison M, Koppel R, Bar-Lev S. Unintended consequences of information technologies in health care: An interactive sociotechnical analysis. JAMIA 2007;14(5):542-9.

Hoffman S, Podgurski A. E-health hazards: Provider liability and electronic health record systems. Berkeley Technology Law Journal 2009;24(4):1523-81.

Hoffman S, Podgurski A. Finding a cure: The case for regulation and oversight of electronic health record systems. Harvard Journal of Law & Technology 2008;22(1):103-65.

Hurdle JF, Adams S, Brokel J, Chang B, Embi P, Peterson C, Terrazas E, Winkelstein P. A code of professional ethical conduct for the American Medical Informatics Association. JAMIA 2007;14(4):391-3.

Kaplan B, Harris-Salamone K. Health IT project success and failure: recommendations from an AMIA workshop. JAMIA 2009;16(3):291-99.

Kaplan B, Litewka S. Ethical challenges of telemedicine and telehealth. Cambridge Quarterly of Healthcare Ethics 2008;17(4):401-16.

Koppel R, Metlay J, Cohen A, Abaluck B, Localio R, Kimmel S, Strom B. Role of computerized physician order entry systems in facilitating medication errors. JAMA 2005;293:1197-1203.

Leviss J. H.I.T. or Miss: Lessons Learned from Health Information Technology Implementations. Chicago: AHIMA, 2010.

McDonnell C, Werner K, Wendel L. Electronic Health Record Usability: Vendor Practices and Perspectives. Rockville, Md. Agency for Healthcare Research and Quality, U.S. Department of Health and Human Services. AHRQ Publication No. 09(10)-0091-3-EF, May 2010. Available from [http://healthit.ahrq.gov/portal/server.pt/gateway/PTARGS\\_0\\_11699\\_911984\\_0\\_0\\_18/EHRVendorPractices&Perspectives.pdf](http://healthit.ahrq.gov/portal/server.pt/gateway/PTARGS_0_11699_911984_0_0_18/EHRVendorPractices&Perspectives.pdf)

Miller RA, Schaffner KF, Meisel A. ethical and legal issues related to the use of computer programs in clinical medicine. *Ann Intern Med.* 1985;102:529-36.

Niazkhani, Z, Pirnejad, H, Berg M, Aarts, J. The impact of computerized provider order entry (CPOE) systems on inpatient clinical workflow: a literature review. *JAMIA* 2009;16(4):539-549.

Office of the National Coordinator for Health Information Technology. Standards & Certification Criteria Final Rule. Available from [http://healthit.hhs.gov/portal/server.pt/community/healthit\\_hhs\\_gov\\_\\_standards\\_ifr/1195](http://healthit.hhs.gov/portal/server.pt/community/healthit_hhs_gov__standards_ifr/1195).

Walker JM, Carayon P, Leveson N, Paulus RA, Tooker J, Chin H, Bothe A Jr, Stewart WF. EHR safety: the way forward to safe and effective systems. *J Am Med Inform Assoc* 2008;15(3):272-7.

Winkelstein P. Ethical and social challenges of electronic health information. In Chen H, Fuller SS, Friedman C, Hersh W, eds., *Medical Informatics: Knowledge Management and Data Mining in Biomedicine*. New York: Springer, 2005, pp. 139-58.
